# Supplementary material for: Synthesis and characterization of mesoporous Pt–Ni (HI–Pt/Ni) alloy particles prepared from lyotropic liquid crystalline media
Source: Royal Society of Chemistry journal article supplement (doi:10.1039/b601678b), 2006-01-01
Supplement: b601678b.pdf [file b601678b.pdf]

Electronic Supplementary Information (Fig. S1~S6)  
Figure S1

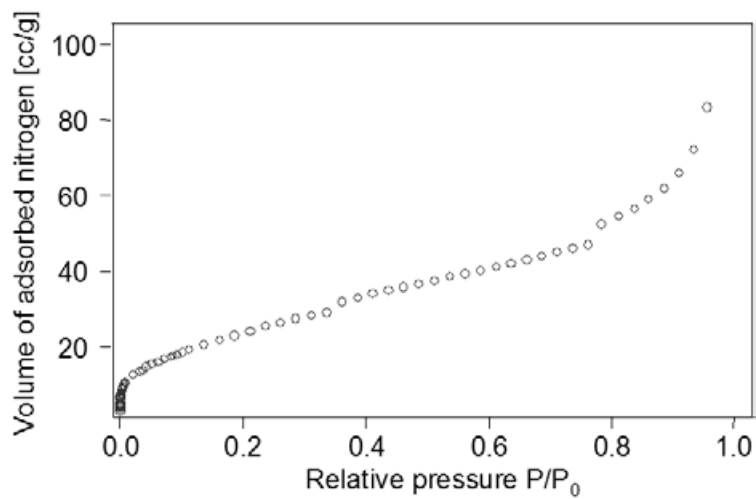

**Fig. S1** N<sub>2</sub> adsorption isotherm of mesoporous Pt–Ni alloy (Sample 3).

**Figure S2**

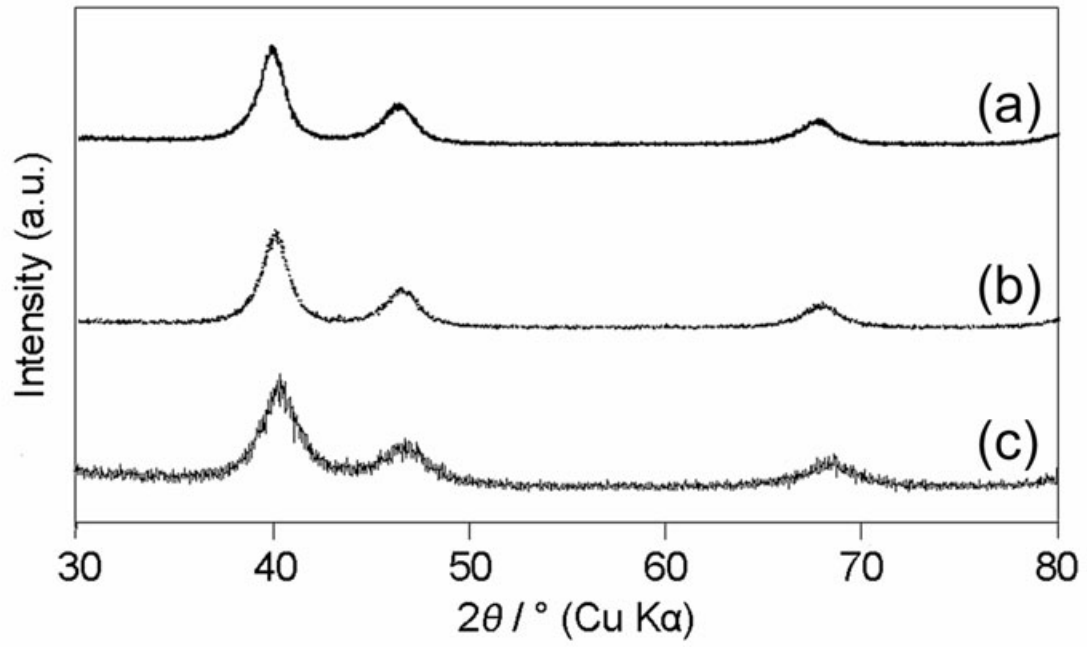

**Fig. S2** High-angle XRD patterns of mesoporous Pt and Pt–Ni alloys. [Trace (a): sample 1, trace (b): sample 3, and trace (c): sample 4.]

**Figure S3**

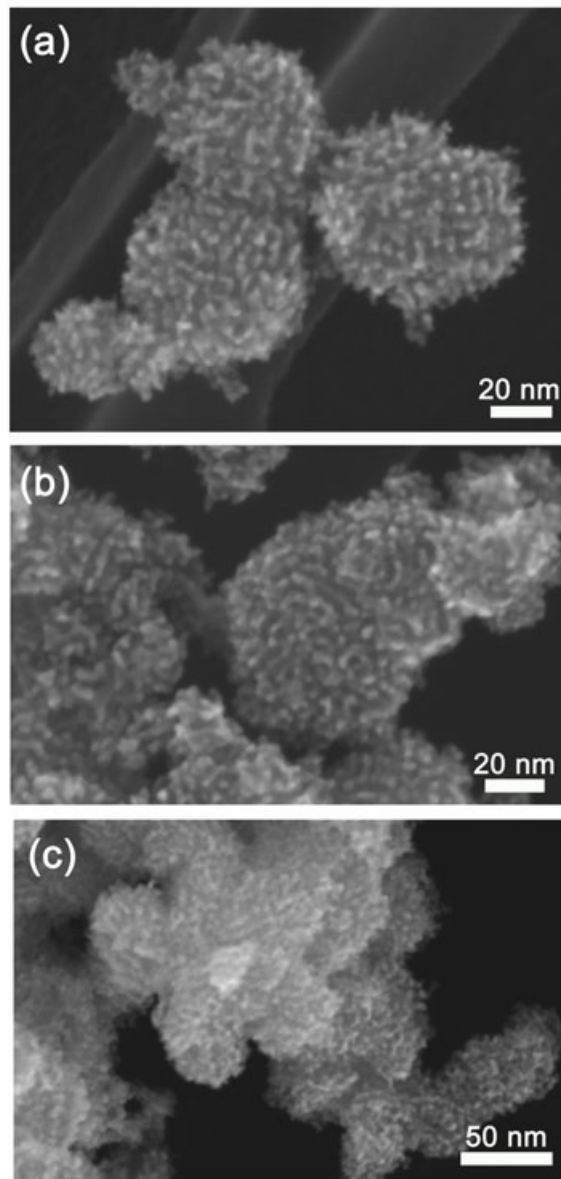

**Fig. S3** HR-SEM images of mesoporous Pt and Pt-Ni alloys. [Image (a): sample 1, image (b): sample 3, and image (c): sample 4.]

**Figure S4**

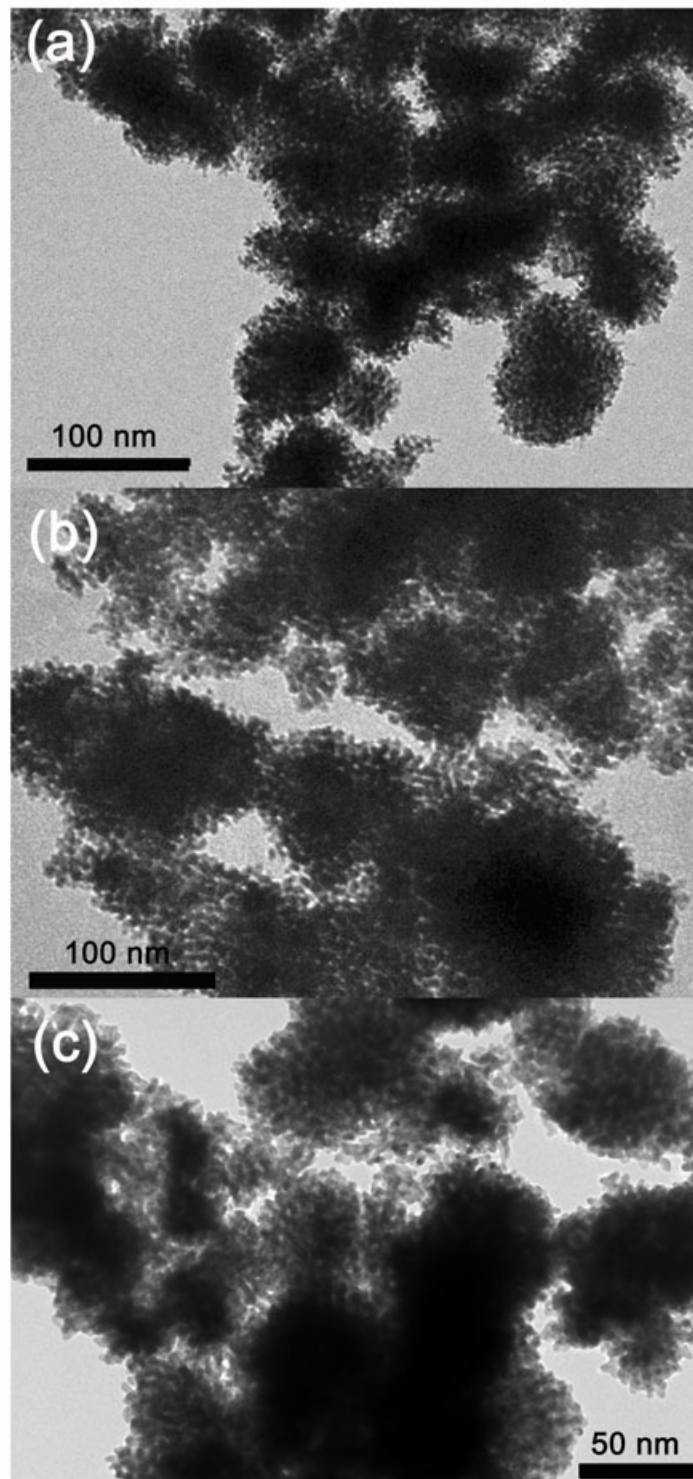

**Fig. S4** TEM images of mesoporous Pt and Pt–Ni alloys. [Image (a): sample **1**, image (b): sample **3**, and image (c): sample **4**.]

**Figure S5**

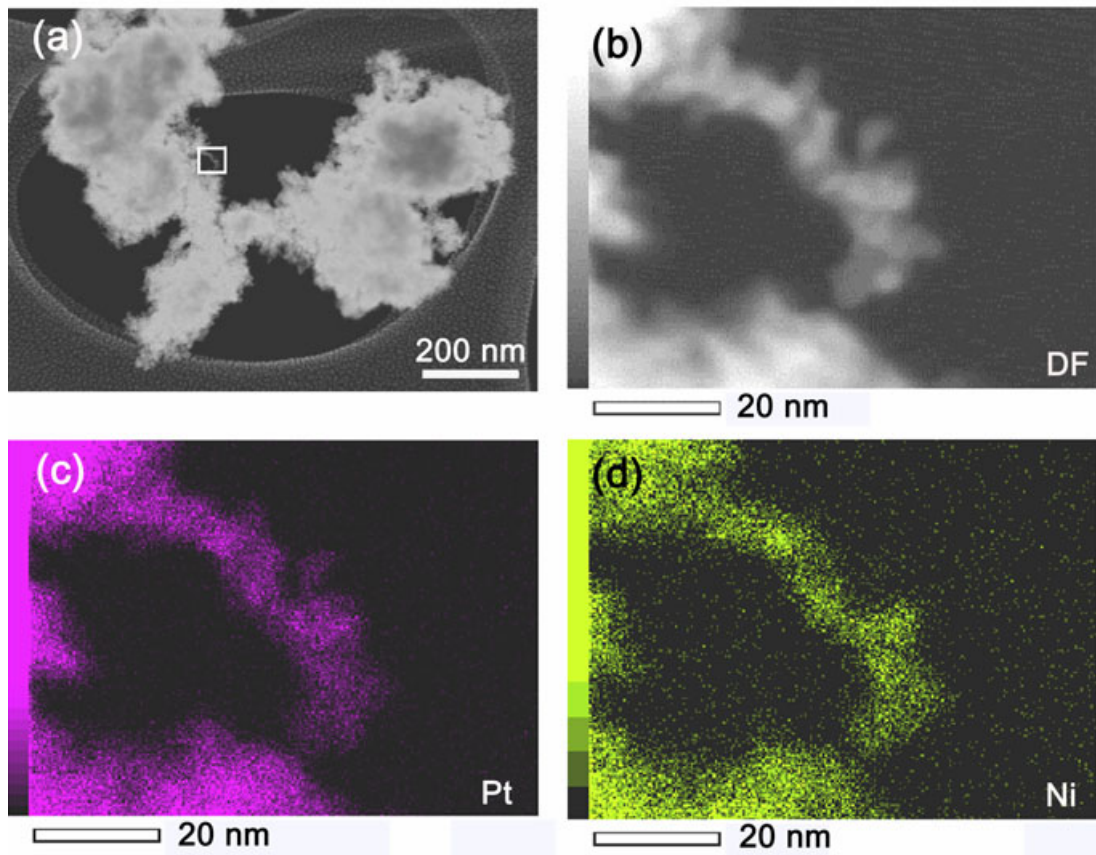

**Fig. S5** Highly magnified EDS mapping of a mesoporous Pt–Ni alloy (sample 4). [Image (a): dark field (DF) STEM image, image (b): Highly magnified DF image of the square area, image (c): distribution of Pt, and image (d): distribution of Ni.]

Figure S6

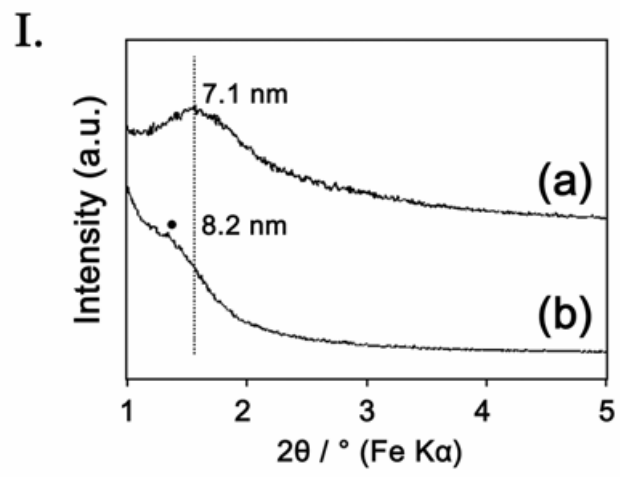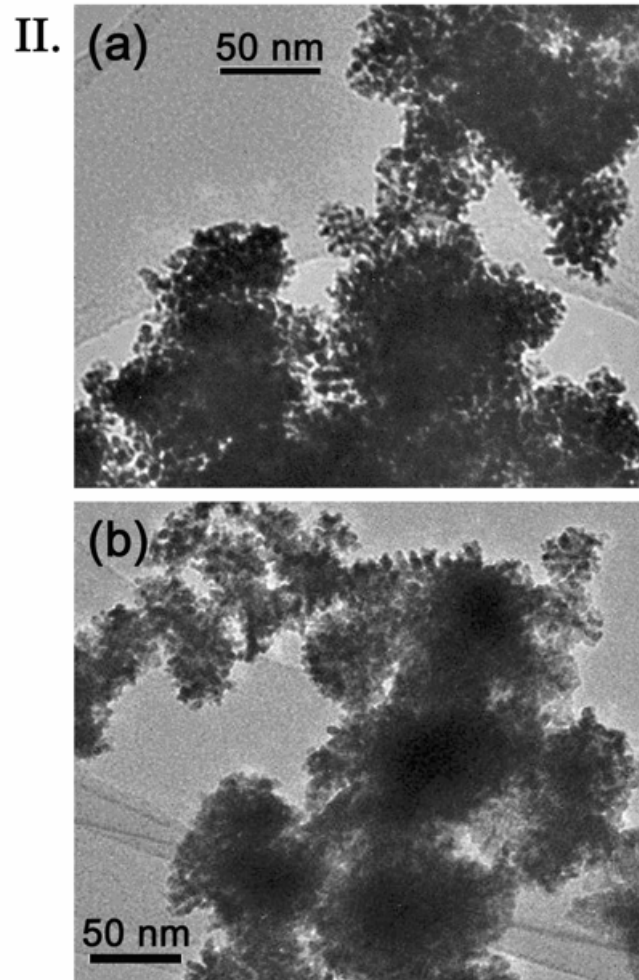

**Fig. S6** Low-angle XRD patterns (Image (I)) and TEM images (Image (II)). [(a) Mesoporous Pt–Ni alloy prepared from a LLC templating mixture made of Brij 56 and (b) mesoporous Pt prepared from a LLC templating mixture made of Brij 76.]
